# Supplementary material
Source: Springer Nature journal article supplement (https://www.springermedizin.de/resource/supplementary/12875_2012_774_MOESM1_ESM.pdf/9435106)

**INTERVENTION centres****CONTROL centres**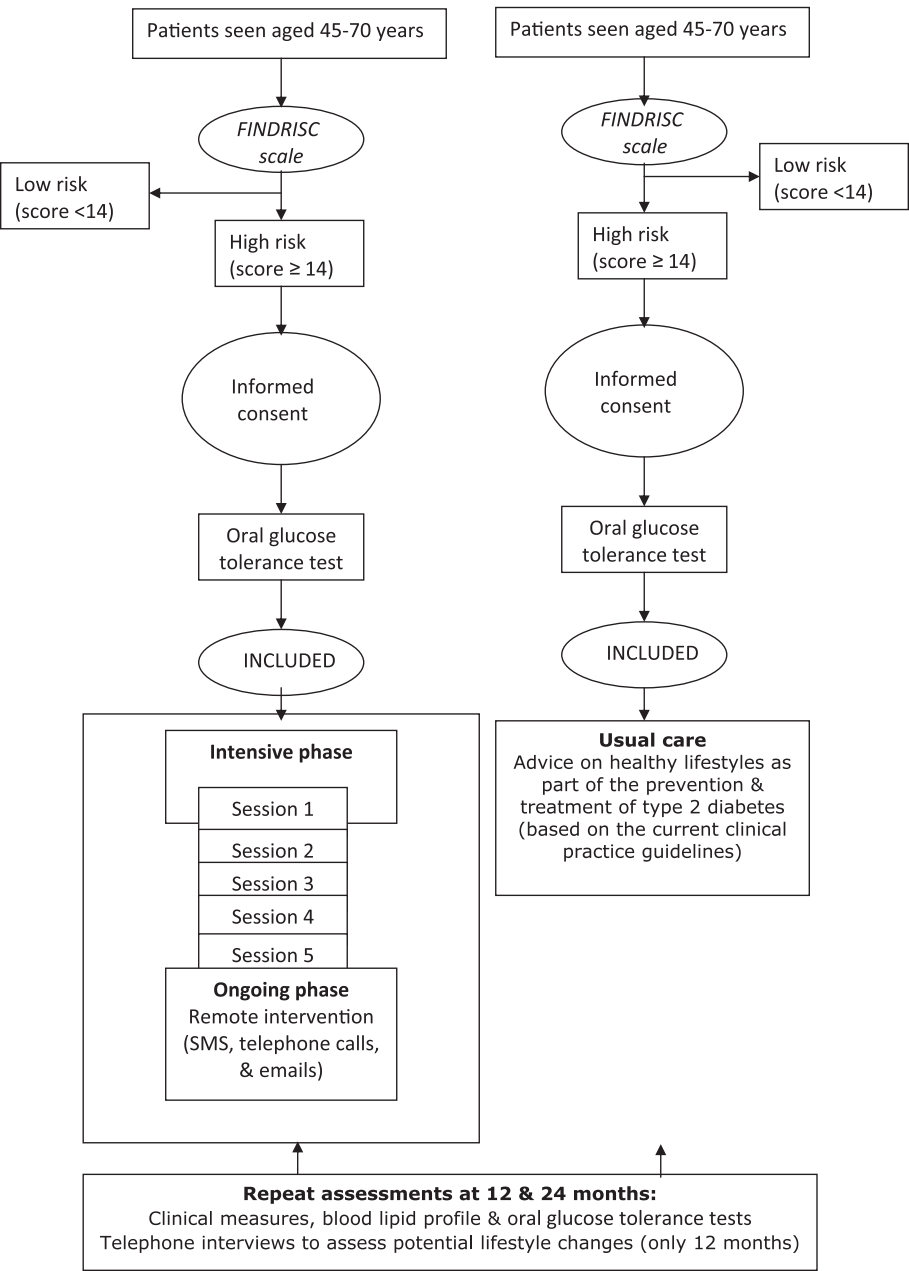

Supplement: MOESM1 [file 9435106]
